# Supplementary material
Source: PubMed Central journal article supplement (PMC3419493)
Supplement: NIHMS394208-supplement-supplement_1.pdf [file NIHMS394208-supplement-supplement_1.pdf]

**Supplemental.**

**Supplemental Figure 1.** Three-dimensional PCA plot of transformed eigenvalue coefficients of the aforementioned descriptor variables against the first three principal components. The red dots represent individual descriptor observations (i.e. normalized score for each protein- and ligand-based descriptor variable), and corresponding vectors are shown as black arrowheads whose direction and length indicate how that variable contributes to the three principal components. With the exception of docking score and hydrogen bond donor (DonorHB), all descriptor variables exhibit positive correlation coefficients across all three components.

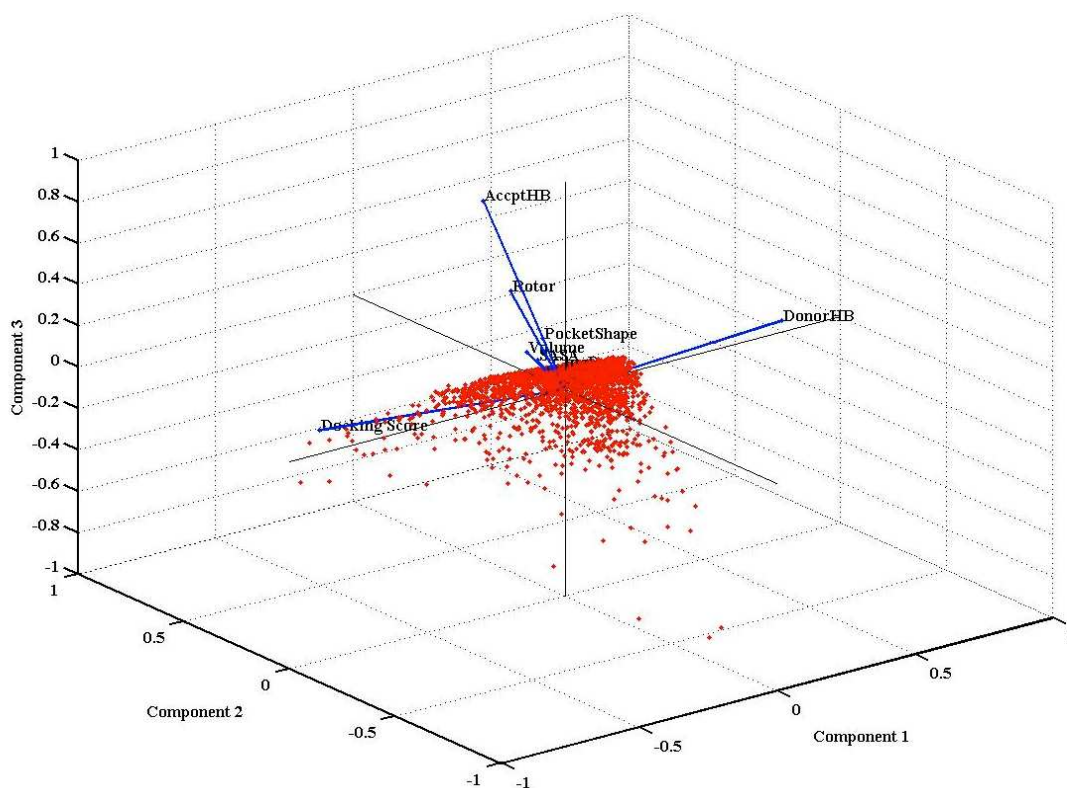

**Supplemental Table 1.** Tabular depiction of PDB IDs within the protein target collection that correspond to protein targets found in the Directory of Useful Decoys (DUD).

| <b>DUD Protein Target Name</b>            | <b>PDB ID</b>                                                                                                                                                                                                                                                                                                                                                                                                                                  |
|-------------------------------------------|------------------------------------------------------------------------------------------------------------------------------------------------------------------------------------------------------------------------------------------------------------------------------------------------------------------------------------------------------------------------------------------------------------------------------------------------|
| Adenosine Deaminase                       | 3IAR, 3LGG                                                                                                                                                                                                                                                                                                                                                                                                                                     |
| Aldose Reductase                          | 2QXW, 1EL3, 1IEI, 1PWM, 1T41, 1X97, 1Z89, 1Z8A, 2ACQ, 2IKG, 2IKH, 2IKI, 2NVC, 2NVD, 2PDG, 2PDI, 2PDL, 2PDW, 2PZN, 2R24, 3BCJ, 3DN5, 3G5E                                                                                                                                                                                                                                                                                                       |
| Androgen Receptor                         | 1GS4, 1T65, 1XOW, 1Z95, 2AX6, 2AX8, 2AX9, 2OZ7, 2PIT, 2PIV, 2PNU, 2Q7I, 2Q7K, 3B5R, 3B65, 3B66, 3B67, 3B68, 3L3X, 3L3Z                                                                                                                                                                                                                                                                                                                         |
| Cyclin Dependent Kinase 2                 | 1AQ1, 1E1X, 1E9H, 1G5S, 1GII, 1GIJ, 1KE5, 1P2A, 1PXL, 1PXM, 1PXN, 1PXO, 1PYE, 1R78, 1URW, 1V1K, 1W0X, 1Y8Y, 1Y91, 1YKR, 2A0C, 2B52, 2B54, 2B55, 2BTR, 2BTS, 2C5N, 2C5X, 2C68, 2C69, 2C6I, 2C6K, 2C6L, 2C6M, 2CCH, 2DS1, 2DUV, 2J9M, 2UZB, 2UZD, 2UZE, 2UZL, 2UZN, 2UZO, 2VV9, 2W05, 2W06, 2W17, 3LFN, 3LFQ, 3LFS                                                                                                                               |
| Dihydrofolate Reductase                   | 1DRF, 1HFR, 1MVT, 1OHK, 1S3U, 1S3V, 1S3W, 1U71, 2DHF, 3EIG                                                                                                                                                                                                                                                                                                                                                                                     |
| Epidermal Growth Factor Receptor          | 1XKK, 1Y6A, 1Y6B, 2EB3, 2ITP, 2ITX, 2OH4, 2P2H, 2P2I, 2QU5, 2QU6, 2RGP, 2RL5, 3B8Q, 3B8R, 3BE2, 3BEL, 3CJF, 3CJG, 3CP9, 3CPB, 3CPC, 3DTW                                                                                                                                                                                                                                                                                                       |
| Factor Xa                                 | 1EZQ, 1FOR, 1FOS, 1FJS, 1G2L, 1IOE, 1IQG, 1IQH, 1IQI, 1IQJ, 1IQL, 1IQM, 1IQN, 1KSN, 1LPG, 1LPK, 1LPZ, 1LQD, 1MQ5, 1MQ6, 1NFU, 1NFW, 1NFX, 1NFY, 1V3X, 1XKA, 1Z6E, 2BMG, 2BOH, 2BOK, 2BQ6, 2BQW, 2EI6, 2EI7, 2EI8, 2J2U, 2J34, 2J38, 2J4I, 2J94, 2J95, 2JKH, 2P16, 2P3T, 2P3U, 2P93, 2P94, 2P95, 2PHB, 2PR3, 2Q1J, 2RA0, 2UWL, 2UWO, 2UWP, 2VH0, 2VH6, 2W26, 2W3I, 2W3K, 3CEN, 3CS7, 3ENS, 3KL6, 3K9X, 3KQB, 3KQC, 3KQD, 3KQE, 3LIW, 3M36, 3M37 |
| Glycinamide Ribonucleotide Transformylase | 1ZLY                                                                                                                                                                                                                                                                                                                                                                                                                                           |

|    |                             |                                                             |
|----|-----------------------------|-------------------------------------------------------------|
| 1  |                             |                                                             |
| 2  |                             |                                                             |
| 3  | Glucocorticoid Receptor     | 1L2I, 1M2Z, 1NHZ, 1T65, 1ZKY, 1ZN8, 2G0G, 2H79, 2PZN, 2VKM, |
| 4  |                             | 3BQD, 3CLD, 3E7C, 3ERD, 3HZF, 3ILZ, 3K23, 3LGG              |
| 5  |                             |                                                             |
| 6  |                             |                                                             |
| 7  | HSP90                       | 1BYQ, 1OSF, 1YET, 2BSM, 2BSM, 2BT0, 2BT0, 2BYH, 2BYH, 2BYI, |
| 8  |                             | 2BYI, 2BZ5, 2CCS, 2CCT, 2CCU, 2QG0, 2QG2, 2UWD, 2UWD, 2VCI, |
| 9  |                             | 2VCJ, 3EKR, 3K97, 3K98, 3K99                                |
| 10 |                             |                                                             |
| 11 |                             |                                                             |
| 12 | P38                         | 1DI9, 1KV1, 1KV2, 1M7Q, 1OVE, 1OZ1, 1PME, 1W82, 1W83,       |
| 13 |                             | 1WBN, 1WBS, 1WBT, 1WBV, 1WBW, 1YQJ, 1ZYJ, 1ZZL, 2GFS,       |
| 14 |                             | 2QD9, 2RG5, 2RG6, 2ZAZ, 2ZB0, 2ZB1, 3BV2, 3BV3, 3BX5, 3CTQ, |
| 15 |                             | 3D7Z, 3D83, 3DS6, 3DT1, 3FC1, 3GCQ, 3GCS, 3GCU, 3GCV, 3HUB, |
| 16 |                             | 3HUC, 3HV6, 3HV7, 3IPH, 3IW5, 3IW6, 3IW7, 3IW8, 3L8S, 3L8X, |
| 17 |                             | 3MPT                                                        |
| 18 |                             |                                                             |
| 19 |                             |                                                             |
| 20 |                             |                                                             |
| 21 |                             |                                                             |
| 22 | Poly(ADP-ribose) Polymerase | 2RCW,3KR8,3L3M,3MHJ,3MHK                                    |
| 23 |                             |                                                             |
| 24 | Phosphodiesterase V         | 2H42                                                        |
| 25 |                             |                                                             |
| 26 | Purine Nucleoside           | 1PF7, 1RCT, 1RFG, 1RSZ, 1V45, 1YRY, 2EB3, 2ITX, 2ON6, 2Q70, |
| 27 | Phosphorylase               | 3BGS, 3GGS, 3K8O, 3K8Q                                      |
| 28 |                             |                                                             |
| 29 |                             |                                                             |
| 30 | Peroxisome Proliferator     | 1KNU, 1NYX, 3CS8, 3FUR, 3K8S                                |
| 31 | Activated Receptor Gamma    |                                                             |
| 32 |                             |                                                             |
| 33 |                             |                                                             |
| 34 | Progesterone Receptor       | 1A28, 1SQN, 1SR7, 2OVH, 2W8Y, 3D90, 3KBA                    |
| 35 |                             |                                                             |
| 36 | SRC                         | 1BYG, 1QCF, 1QPD, 1QPE, 1YOL, 1YOM, 2BDJ, 2C0O, 2H8H, 2P54  |
| 37 |                             |                                                             |
| 38 | Thrombin                    | 1A2C, 1A46, 1A4W, 1A5G, 1B5G, 1BHX, 1C4U, 1C4V, 1CA8, 1D3D, |
| 39 |                             | 1D3T, 1D4P, 1D6W, 1D9I, 1EB1, 1FPC, 1G30, 1G32, 1H8D, 1JWT, |
| 40 |                             | 1K21, 1K22, 1KTS, 1KTT, 1MU6, 1MU8, 1MUE, 1NM6, 1NT1,       |
| 41 |                             | 1NZQ, 1O0D, 1OYT, 1RIW, 1SB1, 1SL3, 1T4U, 1T4V, 1TA2, 1TA6, |
| 42 |                             | 1VZQ, 1WAY, 1YPE, 1YPG, 1YPJ, 1YPK, 1YPL, 1YPM, 1Z71, 1ZGI, |
| 43 |                             | 1ZGV, 2BXU, 2FES, 2JH0, 2JH5, 2JH6, 2PKS, 2R2M, 2UUJ, 2UUK, |
| 44 |                             | 2UWL, 2UWO, 2V3H, 2V3O, 2ZC9, 2ZDA, 2ZDV, 2ZF0, 2ZFF, 2ZFP, |
| 45 |                             | 2ZFQ, 2ZFR, 2ZG0, 2ZGB, 2ZGX, 2ZHE, 2ZHF, 2ZHQ, 2ZHW, 2ZI2, |
| 46 |                             | 2ZIQ, 2ZNK, 2ZO3, 3BIU, 3C27, 3DA9, 3DHK                    |
| 47 |                             |                                                             |
| 48 |                             |                                                             |
| 49 |                             |                                                             |
| 50 |                             |                                                             |
| 51 |                             |                                                             |
| 52 | Thymidine Kinase            | 1W4R, 2WVJ                                                  |
| 53 |                             |                                                             |
| 54 |                             |                                                             |
| 55 | Trypsin                     | 1GJ7, 1GJ8, 1GJ9, 1GJA, 1GJC, 1GJD                          |
| 56 |                             |                                                             |
| 57 |                             |                                                             |
| 58 |                             |                                                             |
| 59 |                             |                                                             |
| 60 |                             |                                                             |

Vascular Endothelial Growth 1Y6A, 1Y6B, 2OH4, 2P2H, 2P2I, 2QU5, 2QU6, 2RL5, 3B8Q, 3B8R,  
Factor Receptor 2 3BE2, 3CJF, 3CJG, 3CP9, 3CPB, 3CPC, 3DTW

**Supplemental Table 2.** Raw score values for each descriptor as noted in the Methods section and Z-rank score for protein targets that were considered to be the Top 1 hit for staurosporine (DB2010) using the TMFS approach. Furthermore, each protein-ligand complex has a line similar to those below (not shown). Thus, it can be extrapolated that the raw data of all protein-ligand interaction permutations total to 2,335 targets X 3,671 ligands = 8,204,685 lines of descriptor scores.

| PDB ID | Docking Score | AccpHB | ClogP  | DonorHB | Electron Affinity | Giobularity | # Rot. Bonds | SASA   | Volume | Ligand Shape | Pocket Shape | Z-Rank Score |
|--------|---------------|--------|--------|---------|-------------------|-------------|--------------|--------|--------|--------------|--------------|--------------|
| 2HY8   | 0.672449808   | 0.9453 | 1      | 0.9444  | 0.9999            | 0.9919      | 1            | 0.9999 | 0.9996 | 0.768584     | 0.761536     | 13.631       |
| 1YVI   | 0.875028394   | 1      | 1      | 0.9989  | 0.9999            | 0.9998      | 1            | 0.9995 | 0.9988 | 0.775387     | 0.760643     | 14.5691      |
| 3FQS   | 0.522309759   | 0.8682 | 0.95   | 0.9965  | 0.9719            | 1           | 0.95         | 0.991  | 0.9978 | 0.819295     | 0.689066     | 12.8314      |
| 2VWV   | 0.442048898   | 0.9933 | 1      | 1       | 0.9927            | 1           | 1            | 0.9738 | 0.9726 | 0.827829     | 0.685366     | 12.727       |
| 1R0P   | 0.822706452   | 0.9948 | 1      | 1       | 0.9998            | 0.9952      | 1            | 0.9988 | 0.9986 | 0.83525      | 0.77387      | 14.4963      |
| 3EQF   | 0.821345165   | 0.9948 | 1      | 0.9965  | 0.9943            | 0.9952      | 1            | 0.9961 | 0.9982 | 0.787755     | 0.797516     | 14.431       |
| 2VTQ   | 0.537657029   | 0.9925 | 0.95   | 0.9998  | 0.9759            | 0.9872      | 0.95         | 0.9955 | 0.9999 | 0.783797     | 0.770382     | 13.1098      |
| 2VU3   | 0.562129482   | 1      | 1      | 0.9996  | 0.9835            | 0.9808      | 1            | 0.9706 | 0.9733 | 0.797526     | 0.758176     | 13.2677      |
| 2RKU   | 0.46518681    | 0.9928 | 0.9875 | 0.9988  | 0.8716            | 0.999       | 0.9875       | 0.9552 | 0.9678 | 0.74663      | 0.751712     | 12.6176      |
| 1AQ1   | 0.885652795   | 1      | 1      | 0.9978  | 0.9971            | 1           | 1            | 0.9999 | 0.9998 | 0.767904     | 0.746055     | 14.5651      |
| 1BYG   | 0.697023234   | 1      | 1      | 0.9994  | 0.991             | 1           | 1            | 0.9981 | 0.9999 | 0.822882     | 0.698677     | 13.8196      |
| 1OKY   | 0.863962184   | 1      | 1      | 0.9998  | 0.9924            | 1           | 1            | 0.9973 | 0.9995 | 0.774026     | 0.763875     | 14.5207      |
| 1Q3D   | 0.73634797    | 1      | 1      | 0.9991  | 1                 | 1           | 1            | 0.9994 | 0.999  | 0.761905     | 0.677498     | 13.8217      |
| 1QPD   | 0.816816505   | 1      | 1      | 0.9985  | 0.9946            | 1           | 1            | 0.9985 | 0.9998 | 0.787755     | 0.749288     | 14.3328      |
| 1SM2   | 0.830555037   | 1      | 1      | 0.9996  | 0.9991            | 1           | 1            | 0.9999 | 1      | 0.76141      | 0.763237     | 14.3701      |
| 1U59   | 0.865553676   | 1      | 1      | 0.9996  | 1                 | 1           | 1            | 0.9991 | 0.9983 | 0.735931     | 0.714668     | 14.3604      |
| 1XBC   | 0.893880093   | 1      | 1      | 0.9999  | 0.9836            | 1           | 1            | 0.996  | 0.9998 | 0.817378     | 0.7384       | 14.6664      |
| 1XJD   | 0.86133885    | 0.9986 | 1      | 0.9942  | 0.9987            | 1           | 1            | 0.9966 | 0.9965 | 0.778912     | 0.748139     | 14.4841      |
| 1YHS   | 0.773450912   | 1      | 1      | 1       | 0.9995            | 1           | 1            | 0.9999 | 0.9995 | 0.761472     | 0.731255     | 14.0782      |
| 2BUJ   | 0.466999409   | 1      | 1      | 0.9992  | 0.9856            | 1           | 1            | 0.9944 | 0.9988 | 0.780519     | 0.710628     | 12.8283      |
| 2DQ7   | 0.722714629   | 1      | 1      | 1       | 0.9867            | 1           | 1            | 0.9963 | 0.9997 | 0.828881     | 0.734913     | 14.0011      |
| 2HW7   | 0.822767946   | 1      | 1      | 0.9996  | 0.9971            | 1           | 1            | 0.9993 | 0.9999 | 0.804515     | 0.754264     | 14.4045      |
| 2NRY   | 0.901679547   | 1      | 1      | 0.9993  | 0.9933            | 1           | 1            | 0.998  | 0.9997 | 0.838033     | 0.748565     | 14.7702      |
| 2OKC   | 0.878598722   | 1      | 1      | 0.9998  | 0.9878            | 1           | 1            | 0.9955 | 0.9991 | 0.773346     | 0.743589     | 14.5305      |
| 2Z7R   | 0.779119528   | 1      | 1      | 0.9978  | 0.9999            | 1           | 1            | 0.9998 | 0.9994 | 0.756895     | 0.715179     | 14.0575      |
| 3A4O   | 0.72635619    | 0.9979 | 1      | 0.9993  | 0.9995            | 1           | 1            | 0.9999 | 1      | 0.820779     | 0.690044     | 13.9237      |
| 3A60   | 0.786378855   | 1      | 1      | 0.9977  | 0.9997            | 1           | 1            | 0.9986 | 0.9985 | 0.750897     | 0.754008     | 14.1498      |
| 3A62   | 0.81615076    | 1      | 1      | 0.9988  | 0.9999            | 1           | 1            | 0.9992 | 0.9989 | 0.741868     | 0.699613     | 14.1444      |
| 3BKB   | 0.856501308   | 1      | 1      | 0.9999  | 0.9968            | 1           | 1            | 0.999  | 0.9999 | 0.746815     | 0.793008     | 14.5013      |
| 3FME   | 0.88065962    | 1      | 1      | 1       | 0.9881            | 1           | 1            | 0.996  | 0.9991 | 0.796475     | 0.775996     | 14.6508      |
| 1PKD   | 0.811851111   | 0.9479 | 0.95   | 0.9982  | 0.9839            | 0.9967      | 0.95         | 0.9982 | 0.9999 | 0.78491      | 0.74193      | 14.1259      |
| 3DTC   | 0.724582576   | 0.9935 | 0.95   | 0.9557  | 0.9821            | 0.9997      | 0.95         | 0.999  | 0.9995 | 0.713234     | 0.706886     | 13.5681      |
